# Supplementary material for: Sorption/Desorption and Kinetics of Atrazine, Chlorfenvinphos, Endosulfan Sulfate and Trifluralin on Agro-Industrial and Composted Organic Wastes
Source: MDPI journal article supplement (doi:10.3390/toxics10020085), 2022-02-14
Supplement: s1 [file s1]

## Article

# Sorption/Desorption and Kinetics of Atrazine, Chlorfenvinphos, Endosulfan Sulfate and Trifluralin on Agro-Industrial and Composted Organic Wastes

Raquel Rojas <sup>1,2</sup>, Guillermo Repetto <sup>1,\*</sup>, José Morillo <sup>2</sup> and José Usero <sup>2</sup>

<sup>1</sup> Area of Toxicology, Department of Molecular Biology and Biochemical Engineering, Universidad Pablo de Olavide, Ctra. de Utrera Km 1, 41013 Seville, Spain; rrojrod@upo.es

<sup>2</sup> Department of Chemical and Environmental Engineering, University of Seville, Camino de los Descubrimientos s/n, 41092 Seville, Spain; jmorillo@us.es (J.M.); usero@us.es (J.U.)

\* Correspondence: grepkuh@upo.es

**Citation:** Rojas, R.; Repetto, G.; Morillo, J.; Usero, J. Sorption/Desorption and Kinetics of Atrazine, Chlorfenvinphos, Endosulfan Sulfate and Trifluralin on Agro-Industrial and Composted Organic Wastes. *Toxics* **2022**, *10*, 85. <https://doi.org/10.3390/toxics10020085>

Academic Editor: Xin-Gui Li

Received: 29 December 2021

Accepted: 9 February 2022

Published: 14 February 2022

**Publisher's Note:** MDPI stays neutral with regard to jurisdictional claims in published maps and institutional affiliations.

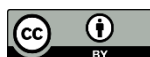

**Copyright:** © 2022 by the authors. Submitted for possible open access publication under the terms and conditions of the Creative Commons Attribution (CC BY) license (<https://creativecommons.org/licenses/by/4.0/>).

**Table S1.** physicochemical properties of the studied pesticides.

| Pesticide          | Type                   | 2D structure diagram | Chem. Family    | Chem. Formula                                                                | Molecular Weight (mol <sup>-1</sup> ) | S <sub>w</sub> (20 °C mg L <sup>-1</sup> ) | DT50 typical (days) | GUS  | K <sub>oc</sub> (mL g <sup>-1</sup> ) | Log K <sub>ow</sub> |
|--------------------|------------------------|----------------------|-----------------|------------------------------------------------------------------------------|---------------------------------------|--------------------------------------------|---------------------|------|---------------------------------------|---------------------|
| Atrazine           | Herbicide              |                      | Triazine        | C <sub>8</sub> H <sub>14</sub> ClN <sub>5</sub>                              | 215.68                                | 35                                         | 75                  | 3.20 | 100                                   | 2.75                |
| Endosulfan sulfate | Metabolite             |                      | Organochlorine  | C <sub>9</sub> H <sub>6</sub> Cl <sub>6</sub> O <sub>4</sub> S               | 422.93                                | 0.48                                       | -                   | -    | 5194                                  | 3.66                |
| Chlorfenvinphos    | Insecticide, Acaricide |                      | Organophosphate | C <sub>12</sub> H <sub>14</sub> Cl <sub>3</sub> O <sub>4</sub>               | 359.57                                | 145                                        | 40                  | 1.87 | 680                                   | 3.85                |
| Trifluralin        | Herbicide              |                      | Dinitroaniline  | C <sub>13</sub> H <sub>16</sub> F <sub>3</sub> N <sub>3</sub> O <sub>4</sub> | 335.28                                | 0.221                                      | 181                 | 0.13 | 15800                                 | 5.27                |

Footnotes: S<sub>w</sub> (20 °C mg L<sup>-1</sup>): Water solubility. DT50: typical half life. GUS: GUS indexes coefficient. K<sub>oc</sub>: normalized organic carbon coefficient. K<sub>ow</sub>: octanol/water coefficient. Data from PPDB (2020).

**Table S2.** Correlation coefficients between sorption-desorption and kinetic parameters and pesticides physicochemical properties ( $n = 4$ ,  $p < 0.05$ ).

|                                                           | Molecular Weight (mol <sup>-1</sup> ) | S <sub>w</sub> (20 °C mg/L) | DT50 typical(days) | GUS   | K <sub>oc</sub> (mL/g) | Log K <sub>ow</sub> | Molecular Weight (mol <sup>-1</sup> ) | S <sub>w</sub> (20 °C mg/L) | DT50 typical(days) | GUS   | K <sub>oc</sub> (mL/g) | Log K <sub>ow</sub> |
|-----------------------------------------------------------|---------------------------------------|-----------------------------|--------------------|-------|------------------------|---------------------|---------------------------------------|-----------------------------|--------------------|-------|------------------------|---------------------|
| Sorption capacity (%) (600 mg - Effect of adsorbent dose) |                                       |                             |                    |       |                        |                     | K <sub>2</sub>                        |                             |                    |       |                        |                     |
| OR1                                                       | 0.89                                  | 0.44                        | -0.22              | -0.64 | 0.31                   | 0.57                | 0.05                                  | -0.45                       | 0.97               | -0.48 | 0.42                   | 0.68                |
| OR2                                                       | 0.85                                  | -0.11                       | 0.37               | -0.93 | 0.70                   | 0.95                | 0.46                                  | -0.66                       | 0.77               | -0.84 | 0.84                   | 0.93                |
| OR3                                                       | 0.88                                  | -0.08                       | 0.31               | -0.93 | 0.70                   | 0.94                | 0.48                                  | -0.83                       | 0.58               | -0.84 | 0.96                   | 0.85                |
| OR4                                                       | 0.82                                  | -0.36                       | 0.44               | -0.99 | 0.86                   | 0.99                | 0.06                                  | -0.42                       | 0.97               | -0.49 | 0.41                   | 0.68                |
| K <sub>i</sub>                                            |                                       |                             |                    |       |                        |                     | X <sub>i</sub>                        |                             |                    |       |                        |                     |
| OR1                                                       | 0.14                                  | 0.85                        | -0.90              | 0.38  | -0.55                  | -0.52               | 0.89                                  | -0.01                       | 0.27               | -0.91 | 0.65                   | 0.91                |
| OR2                                                       | -0.53                                 | 0.79                        | -0.58              | 0.87  | -0.96                  | -0.89               | 0.83                                  | -0.27                       | 0.42               | -0.97 | 0.81                   | 0.99                |
| OR3                                                       | 0.06                                  | 1.00                        | -0.61              | 0.40  | -0.69                  | -0.44               | 0.80                                  | -0.37                       | 0.46               | -0.98 | 0.86                   | 1.00                |
| OR4                                                       | 0.28                                  | 0.81                        | -0.91              | 0.24  | -0.42                  | -0.40               | 0.67                                  | -0.50                       | 0.62               | -0.95 | 0.87                   | 0.99                |
| N <sub>fa</sub>                                           |                                       |                             |                    |       |                        |                     | K <sub>fa</sub>                       |                             |                    |       |                        |                     |
| OR1                                                       | 0.04                                  | -0.93                       | 0.80               | -0.53 | 0.73                   | 0.62                | 0.76                                  | -0.62                       | 0.27               | -0.94 | 0.99                   | 0.88                |
| OR2                                                       | 0.60                                  | 0.61                        | 0.04               | -0.41 | 0.00                   | 0.45                | 0.36                                  | -0.83                       | 0.74               | -0.78 | 0.88                   | 0.84                |
| OR3                                                       | 0.72                                  | -0.59                       | 0.48               | -0.97 | 0.96                   | 0.97                | 0.42                                  | -0.63                       | 0.81               | -0.81 | 0.79                   | 0.91                |
| OR4                                                       | 0.92                                  | -0.07                       | 0.23               | -0.94 | 0.72                   | 0.92                | 0.32                                  | -0.70                       | 0.85               | -0.75 | 0.77                   | 0.86                |
| K <sub>d</sub>                                            |                                       |                             |                    |       |                        |                     | K <sub>oc</sub>                       |                             |                    |       |                        |                     |
| OR1                                                       | 0.50                                  | -0.75                       | 0.67               | -0.87 | 0.92                   | 0.91                | 0.50                                  | -0.75                       | 0.67               | -0.87 | 0.92                   | 0.91                |
| OR2                                                       | 0.32                                  | -0.64                       | 0.87               | -0.74 | 0.73                   | 0.87                | 0.32                                  | -0.64                       | 0.87               | -0.74 | 0.73                   | 0.87                |
| OR3                                                       | 0.24                                  | -0.57                       | 0.92               | -0.67 | 0.63                   | 0.82                | 0.24                                  | -0.57                       | 0.92               | -0.67 | 0.63                   | 0.82                |
| OR4                                                       | 0.25                                  | -0.57                       | 0.92               | -0.67 | 0.63                   | 0.82                | 0.25                                  | -0.57                       | 0.92               | -0.67 | 0.63                   | 0.82                |
| N <sub>fd</sub>                                           |                                       |                             |                    |       |                        |                     | K <sub>fd</sub>                       |                             |                    |       |                        |                     |
| OR1                                                       | 0.27                                  | 0.97                        | -0.50              | 0.16  | -0.52                  | -0.19               |                                       | -0.88                       | 0.75               | -0.71 | 0.85                   | 0.77                |
| OR2                                                       | 0.56                                  | -0.21                       | -0.85              | -0.26 | 0.43                   | 0.02                | 0.46                                  | -0.76                       | 0.87               | -0.72 | 0.59                   | 0.87                |
| OR3                                                       | 0.68                                  | -0.36                       | -0.76              | -0.41 | 0.56                   | 0.17                | 0.63                                  | -0.88                       | 0.75               | -0.85 | 0.74                   | 0.95                |
| OR4                                                       | -0.62                                 | 0.87                        | -0.76              | 0.84  | -0.73                  | -0.95               | 0.75                                  | -0.94                       | 0.63               | -0.92 | 0.84                   | 0.99                |
| H                                                         |                                       |                             |                    |       |                        |                     | %D                                    |                             |                    |       |                        |                     |
| OR1                                                       | -0.33                                 | -0.91                       | 0.76               | -0.17 | 0.45                   | 0.28                | 0.05                                  | 1.00                        | -0.60              | 0.40  | -0.70                  | -0.43               |
| OR2                                                       | -0.06                                 | -0.31                       | 1.00               | -0.26 | 0.08                   | 0.49                | -0.37                                 | 0.86                        | -0.68              | 0.78  | -0.91                  | -0.82               |
| OR3                                                       | -0.17                                 | -0.21                       | 0.99               | -0.16 | -0.02                  | 0.39                | 0.31                                  | 0.95                        | -0.64              | 0.16  | -0.49                  | -0.23               |
| OR4                                                       | 0.28                                  | -0.62                       | 0.95               | -0.58 | 0.42                   | 0.76                | -0.20                                 | 0.95                        | -0.67              | 0.64  | -0.85                  | -0.68               |

**Table S3.** Determination coefficients between sorption-desorption and kinetic parameters and physicochemical properties of organic wastes ( $p < 0.05$ ).

|                                                           | %TOC         | BET          | pH           | C           | N   | O           | Na  | Mg    | Al  | Si           | P   | S    | Cl           | K           | Ca           | Ti  | Fe  | Cu  |          |
|-----------------------------------------------------------|--------------|--------------|--------------|-------------|-----|-------------|-----|-------|-----|--------------|-----|------|--------------|-------------|--------------|-----|-----|-----|----------|
| <i>n</i>                                                  | 4            | 4            | 4            | 4           | 2   | 4           | 2   | 3     | 2   | 3            | 1   | 2    | 3            | 3           | 3            | 1   | 2   | 1   | <i>n</i> |
| Sorption capacity (%) (600 mg - Effect of adsorbent dose) |              |              |              |             |     |             |     |       |     |              |     |      |              |             |              |     |     |     |          |
| AT                                                        | 0.52         | -0.47        | -0.92        | <b>0.95</b> | n/a | -0.20       | n/a | -0.39 | n/a | -0.01        | n/a | n/a  | -0.52        | 0.49        | -0.52        | n/a | n/a | n/a | 4        |
| TF                                                        | -0.46        | 0.40         | 0.89         | -0.93       | n/a | 0.27        | n/a | 0.04  | n/a | -0.34        | n/a | n/a  | 0.18         | -0.15       | 0.19         | n/a | n/a | n/a | 4        |
| CF                                                        | 0.78         | -0.87        | <b>-0.97</b> | <b>0.95</b> | n/a | 0.36        | n/a | -0.99 | n/a | -0.87        | n/a | 1.00 | <b>-1.00</b> | <b>1.00</b> | <b>-1.00</b> | n/a | n/a | n/a | 4        |
| ES                                                        | 0.03         | 0.33         | 0.75         | -0.62       | n/a | 0.20        | n/a | 0.05  | n/a | -0.33        | n/a | n/a  | 0.20         | -0.17       | 0.20         | n/a | n/a | n/a | 4        |
| Q <sub>e</sub> exp                                        |              |              |              |             |     |             |     |       |     |              |     |      |              |             |              |     |     |     |          |
| AT                                                        | 0.42         | -0.51        | -0.94        | 0.92        | n/a | -0.14       | n/a | -0.35 | n/a | 0.03         | n/a | n/a  | -0.48        | 0.46        | -0.49        | n/a | n/a | n/a | 4        |
| TF                                                        | -0.24        | 0.38         | 0.87         | -0.83       | n/a | 0.26        | n/a | 0.03  | n/a | -0.35        | n/a | n/a  | 0.18         | -0.15       | 0.18         | n/a | n/a | n/a | 4        |
| CF                                                        | 0.86         | -0.83        | -0.94        | <b>0.96</b> | n/a | 0.32        | n/a | -0.99 | n/a | -0.97        | n/a | n/a  | -0.96        | 0.96        | -0.95        | n/a | n/a | n/a | 4        |
| ES                                                        | 0.19         | 0.30         | 0.63         | -0.46       | n/a | 0.12        | n/a | 0.09  | n/a | -0.30        | n/a | n/a  | 0.23         | -0.20       | 0.24         | n/a | n/a | n/a | 4        |
| K <sub>2</sub>                                            |              |              |              |             |     |             |     |       |     |              |     |      |              |             |              |     |     |     |          |
| AT                                                        | 0.86         | -0.84        | -0.42        | 0.43        | n/a | 0.84        | n/a | -0.88 | n/a | <b>-1.00</b> | n/a | n/a  | -0.81        | 0.83        | **           | n/a | n/a | n/a | 4        |
| TF                                                        | 0.66         | <b>-0.96</b> | -0.89        | 0.79        | n/a | 0.60        | n/a | -0.96 | n/a | -0.78        | n/a | n/a  | -0.99        | 0.98        | -0.99        | n/a | n/a | n/a | 4        |
| CF                                                        | 0.52         | -0.71        | -0.10        | 0.02        | n/a | <b>0.98</b> | n/a | -0.95 | n/a | <b>-1.00</b> | n/a | n/a  | -0.90        | 0.91        | -0.90        | n/a | n/a | n/a | 4        |
| ES                                                        | 0.67         | -0.49        | -0.90        | <b>0.98</b> | n/a | -0.15       | n/a | -0.95 | n/a | <b>-1.00</b> | n/a | n/a  | -0.90        | 0.91        | -0.90        | n/a | n/a | n/a | 4        |
| K <sub>i</sub>                                            |              |              |              |             |     |             |     |       |     |              |     |      |              |             |              |     |     |     |          |
| AT                                                        | <b>-0.98</b> | 0.83         | 0.62         | -0.68       | n/a | -0.62       | n/a | 0.83  | n/a | 0.98         | n/a | n/a  | 0.74         | -0.76       | 0.74         | n/a | n/a | n/a | 4        |
| TF                                                        | -0.10        | -0.56        | -0.56        | 0.31        | n/a | 0.36        | n/a | -0.50 | n/a | -0.13        | n/a | n/a  | -0.62        | 0.60        | -0.62        | n/a | n/a | n/a | 4        |
| CF                                                        | -0.50        | 0.91         | 0.87         | -0.72       | n/a | -0.55       | n/a | 0.87  | n/a | 0.62         | n/a | n/a  | 0.93         | -0.92       | 0.93         | n/a | n/a | n/a | 4        |
| ES                                                        | -0.33        | 0.88         | 0.61         | -0.40       | n/a | -0.77       | n/a | 0.88  | n/a | 0.64         | n/a | n/a  | 0.94         | -0.93       | 0.94         | n/a | n/a | n/a | 4        |
| X <sub>i</sub>                                            |              |              |              |             |     |             |     |       |     |              |     |      |              |             |              |     |     |     |          |
| AT                                                        | 0.91         | -0.90        | -0.88        | 0.89        | n/a | 0.49        | n/a | -0.97 | n/a | -0.99        | n/a | n/a  | -0.93        | 0.94        | -0.93        | n/a | n/a | n/a | 4        |
| TF                                                        | -0.02        | -0.21        | 0.46         | -0.56       | n/a | 0.78        | n/a | -0.95 | n/a | <b>-1.00</b> | n/a | n/a  | -0.90        | 0.91        | -0.89        | n/a | n/a | n/a | 4        |
| CF                                                        | 0.62         | -0.89        | <b>-0.96</b> | 0.86        | n/a | 0.43        | n/a | -0.90 | n/a | -0.67        | n/a | n/a  | -0.96        | 0.95        | -0.96        | n/a | n/a | n/a | 4        |
| ES                                                        | 0.44         | -0.87        | -0.38        | 0.21        | n/a | <b>0.96</b> | n/a | -0.99 | n/a | -0.87        | n/a | n/a  | <b>-1.00</b> | <b>1.00</b> | <b>-1.00</b> | n/a | n/a | n/a | 4        |
| n <sub>fa</sub>                                           |              |              |              |             |     |             |     |       |     |              |     |      |              |             |              |     |     |     |          |
| AT                                                        | 0.03         | -0.51        | -0.77        | 0.60        | n/a | 0.06        | n/a | -0.33 | n/a | 0.05         | n/a | n/a  | -0.47        | 0.44        | -0.47        | n/a | n/a | n/a | 4        |
| TF                                                        | -0.27        | -0.21        | -0.56        | 0.39        | n/a | -0.19       | n/a | 0.00  | n/a | 0.38         | n/a | n/a  | -0.14        | 0.11        | -0.15        | n/a | n/a | n/a | 4        |
| CF                                                        | -0.77        | 0.17         | 0.09         | -0.31       | n/a | -0.12       | n/a | 0.13  | n/a | 0.50         | n/a | n/a  | -0.02        | -0.01       | -0.02        | n/a | n/a | n/a | 4        |
| ES                                                        | -0.35        | -0.18        | -0.49        | 0.30        | n/a | -0.16       | n/a | -0.01 | n/a | 0.37         | n/a | n/a  | -0.15        | 0.13        | -0.16        | n/a | n/a | n/a | 4        |
| K <sub>fa</sub>                                           |              |              |              |             |     |             |     |       |     |              |     |      |              |             |              |     |     |     |          |
| AT                                                        | -0.28        | 0.73         | 0.88         | -0.71       | n/a | -0.28       | n/a | 0.62  | n/a | 0.27         | n/a | n/a  | 0.72         | -0.70       | 0.73         | n/a | n/a | n/a | 4        |
| TF                                                        | 0.09         | 0.29         | 0.71         | -0.58       | n/a | 0.22        | n/a | 0.01  | n/a | -0.37        | n/a | n/a  | 0.15         | -0.12       | 0.16         | n/a | n/a | n/a | 4        |
| CF                                                        | 0.34         | 0.14         | 0.50         | -0.33       | n/a | 0.24        | n/a | -0.07 | n/a | -0.44        | n/a | n/a  | 0.07         | -0.05       | 0.08         | n/a | n/a | n/a | 4        |
| ES                                                        | 0.22         | 0.24         | 0.61         | -0.45       | n/a | 0.20        | n/a | 0.00  | n/a | -0.38        | n/a | n/a  | 0.14         | -0.12       | 0.15         | n/a | n/a | n/a | 4        |
| K <sub>d</sub>                                            |              |              |              |             |     |             |     |       |     |              |     |      |              |             |              |     |     |     |          |
| AT                                                        | 0.43         | -0.50        | -0.94        | 0.92        | n/a | -0.16       | n/a | -0.34 | n/a | 0.05         | n/a | n/a  | -0.47        | 0.44        | -0.47        | n/a | n/a | n/a | 4        |
| TF                                                        | -0.04        | 0.37         | 0.79         | -0.68       | n/a | 0.19        | n/a | 0.08  | n/a | -0.30        | n/a | n/a  | 0.22         | -0.20       | 0.23         | n/a | n/a | n/a | 4        |
| CF                                                        | -0.17        | 0.65         | 0.84         | -0.66       | n/a | -0.20       | n/a | 0.51  | n/a | 0.14         | n/a | n/a  | 0.63         | -0.61       | 0.63         | n/a | n/a | n/a | 4        |
| ES                                                        | 0.12         | 0.35         | 0.68         | -0.51       | n/a | 0.09        | n/a | 0.14  | n/a | -0.25        | n/a | n/a  | 0.28         | -0.25       | 0.29         | n/a | n/a | n/a | 4        |
| K <sub>oc</sub>                                           |              |              |              |             |     |             |     |       |     |              |     |      |              |             |              |     |     |     |          |
| AT                                                        | -0.74        | 0.09         | 0.24         | -0.49       | n/a | 0.15        | n/a | -0.10 | n/a | 0.29         | n/a | n/a  | -0.24        | 0.21        | -0.25        | n/a | n/a | n/a | 4        |
| TF                                                        | -0.25        | 0.42         | 0.88         | -0.83       | n/a | 0.22        | n/a | 0.11  | n/a | -0.28        | n/a | n/a  | 0.25         | -0.22       | 0.26         | n/a | n/a | n/a | 4        |
| CF                                                        | -0.49        | 0.70         | <b>0.98</b>  | -0.92       | n/a | -0.10       | n/a | 0.69  | n/a | 0.36         | n/a | n/a  | 0.78         | -0.77       | 0.79         | n/a | n/a | n/a | 4        |
| ES                                                        | -0.45        | 0.47         | 0.93         | -0.93       | n/a | 0.19        | n/a | 0.29  | n/a | -0.09        | n/a | n/a  | 0.43         | -0.40       | 0.43         | n/a | n/a | n/a | 4        |
| n <sub>fd</sub>                                           |              |              |              |             |     |             |     |       |     |              |     |      |              |             |              |     |     |     |          |
| AT                                                        | -0.49        | 0.60         | -0.04        | 0.09        | n/a | -0.94       | n/a | 0.90  | n/a | <b>1.00</b>  | n/a | n/a  | 0.83         | -0.85       | 0.83         | n/a | n/a | n/a | 4        |
| TF                                                        | 0.20         | -0.36        | -0.85        | 0.81        | n/a | -0.27       | n/a | 0.00  | n/a | 0.38         | n/a | n/a  | -0.14        | 0.11        | -0.15        | n/a | n/a | n/a | 4        |
| CF                                                        | n/a          | n/a          | n/a          | n/a         | n/a | n/a         | n/a | n/a   | n/a | n/a          | n/a | n/a  | n/a          | n/a         | n/a          | n/a | n/a | n/a | 2        |

|                 |       |              |       |       |     |             |     |       |     |              |     |     |       |       |       |     |     |     |   |
|-----------------|-------|--------------|-------|-------|-----|-------------|-----|-------|-----|--------------|-----|-----|-------|-------|-------|-----|-----|-----|---|
| ES              | -0.27 | -0.21        | -0.57 | 0.39  | n/a | -0.19       | n/a | 0.00  | n/a | 0.38         | n/a | n/a | -0.14 | 0.11  | -0.15 | n/a | n/a | n/a | 4 |
| K <sub>id</sub> |       |              |       |       |     |             |     |       |     |              |     |     |       |       |       |     |     |     |   |
| AT              | 0.75  | <b>-0.96</b> | -0.57 | 0.49  | n/a | 0.90        | n/a | -0.99 | n/a | -0.96        | n/a | n/a | -0.96 | 0.97  | -0.96 | n/a | n/a | n/a | 4 |
| TF              | -0.19 | 0.37         | 0.85  | -0.80 | n/a | 0.26        | n/a | 0.01  | n/a | -0.37        | n/a | n/a | 0.15  | -0.12 | 0.16  | n/a | n/a | n/a | 4 |
| CF              | n/a   | n/a          | n/a   | n/a   | n/a | n/a         | n/a | n/a   | n/a | n/a          | n/a | n/a | n/a   | n/a   | n/a   | n/a | n/a | n/a | 2 |
| ES              | 0.16  | 0.38         | 0.64  | -0.45 | n/a | 0.01        | n/a | 0.20  | n/a | -0.19        | n/a | n/a | 0.34  | -0.31 | 0.34  | n/a | n/a | n/a | 4 |
| H               |       |              |       |       |     |             |     |       |     |              |     |     |       |       |       |     |     |     |   |
| AT              | 0.55  | -0.71        | -0.10 | 0.03  | n/a | <b>0.98</b> | n/a | -0.95 | n/a | <b>-1.00</b> | n/a | n/a | -0.89 | 0.90  | -0.89 | n/a | n/a | n/a | 4 |
| TF              | 0.01  | 0.30         | 0.76  | -0.65 | n/a | 0.25        | n/a | -0.01 | n/a | -0.39        | n/a | n/a | 0.13  | -0.10 | 0.14  | n/a | n/a | n/a | 4 |
| CF              | n/a   | n/a          | n/a   | n/a   | n/a | n/a         | n/a | n/a   | n/a | n/a          | n/a | n/a | n/a   | n/a   | n/a   | n/a | n/a | n/a | 2 |
| ES              | -0.06 | 0.55         | 0.79  | -0.61 | n/a | -0.10       | n/a | 0.38  | n/a | 0.00         | n/a | n/a | 0.51  | -0.48 | 0.51  | n/a | n/a | n/a | 4 |
| %D              |       |              |       |       |     |             |     |       |     |              |     |     |       |       |       |     |     |     |   |
| AT              | -0.91 | 0.65         | 0.31  | -0.41 | n/a | -0.65       | n/a | 0.68  | n/a | 0.91         | n/a | n/a | 0.57  | -0.59 | 0.56  | n/a | n/a | n/a | 4 |
| TF              | 0.22  | -0.37        | -0.86 | 0.82  | n/a | -0.27       | n/a | 0.00  | n/a | 0.38         | n/a | n/a | -0.14 | 0.12  | -0.15 | n/a | n/a | n/a | 4 |
| CF              | n/a   | n/a          | n/a   | n/a   | n/a | n/a         | n/a | n/a   | n/a | n/a          | n/a | n/a | n/a   | n/a   | n/a   | n/a | n/a | n/a | 2 |
| ES              | 0.03  | -0.69        | -0.55 | 0.30  | n/a | 0.56        | n/a | -0.67 | n/a | -0.34        | n/a | n/a | -0.77 | 0.75  | -0.78 | n/a | n/a | n/a | 4 |

Footnotes: AT: Atrazine, TF: Trifluralin, CF: chlorfenvinphos, ES: endosulfan sulfate. Kinetic parameters:  $Q_e$  exp (quantity of pesticide adsorbed at equilibrium),  $K_2$  (Ho and McKay rate constants),  $K_i$  (intraparticle diffusion rate constant),  $X_i$  (Morris-Weber constant, proportional to the boundary layer thickness). Sorption constants:  $n_{fa}$  (Freundlich coefficient correlated to adsorption intensity),  $K_{fa}$  (Freundlich constant correlated to the maximum multilayer adsorption capacity).  $K_d$  (lineal sorption constant, calculated for one sorption concentration ( $200 \mu\text{g L}^{-1}$ )),  $K_{oc}$  (normalized organic carbon coefficient, calculated as  $(K_d/\%COT) \cdot 100$ , where  $K_d = Q_e/C_e$ ),  $n_{fd}$  (Freundlich coefficient correlated to desorption intensity) Desorption constants:  $K_{fd}$  (Freundlich constant correlated to the maximum multilayer desorption capacity),  $H$  (hysteresis coefficient), %D (desorption percentages). In bold: significant correlations.

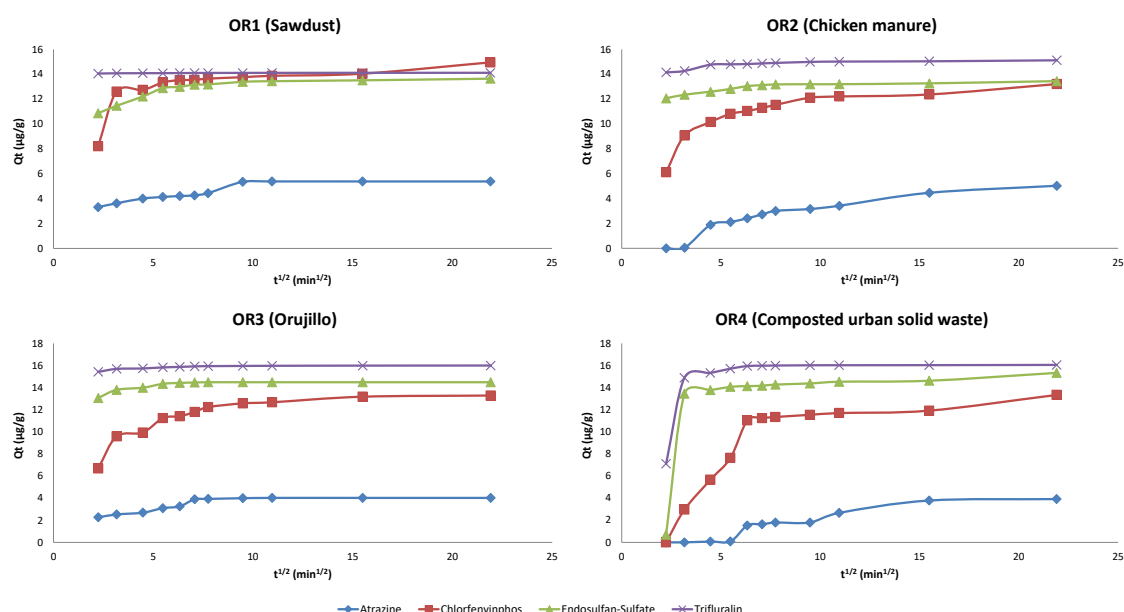

Figure S1. Weber-Morris intraparticle diffusion model of each studied adsorbent for the different pesticides.

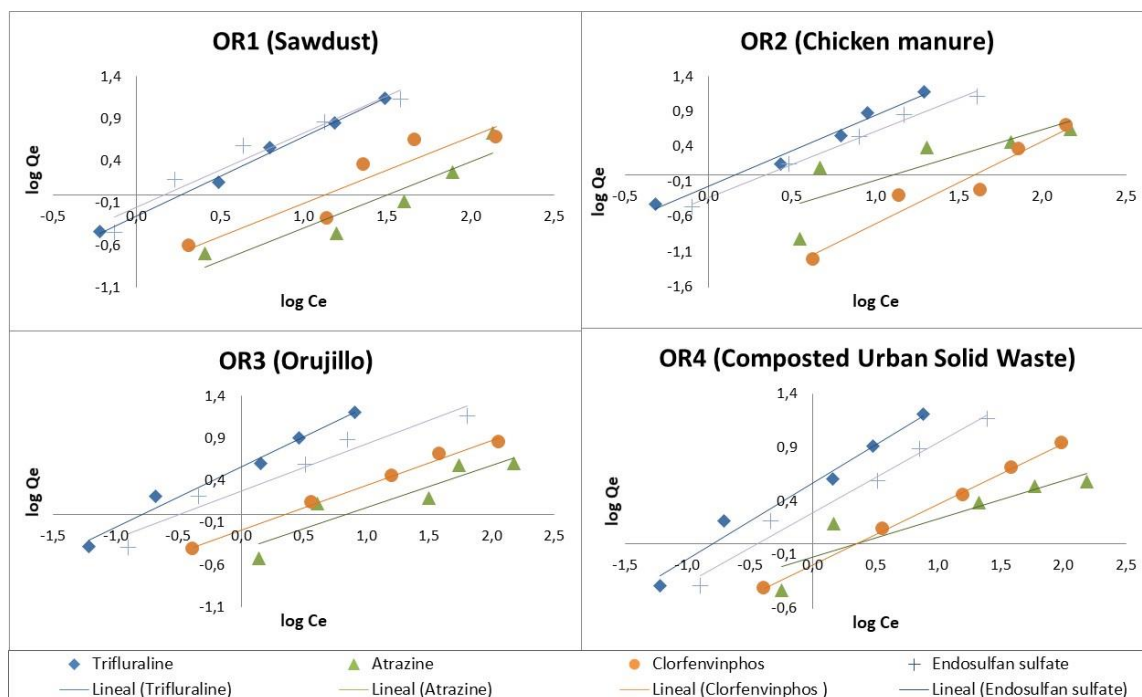

Figure S2. Freundlich sorption isotherms of all pesticides on each organic residue.

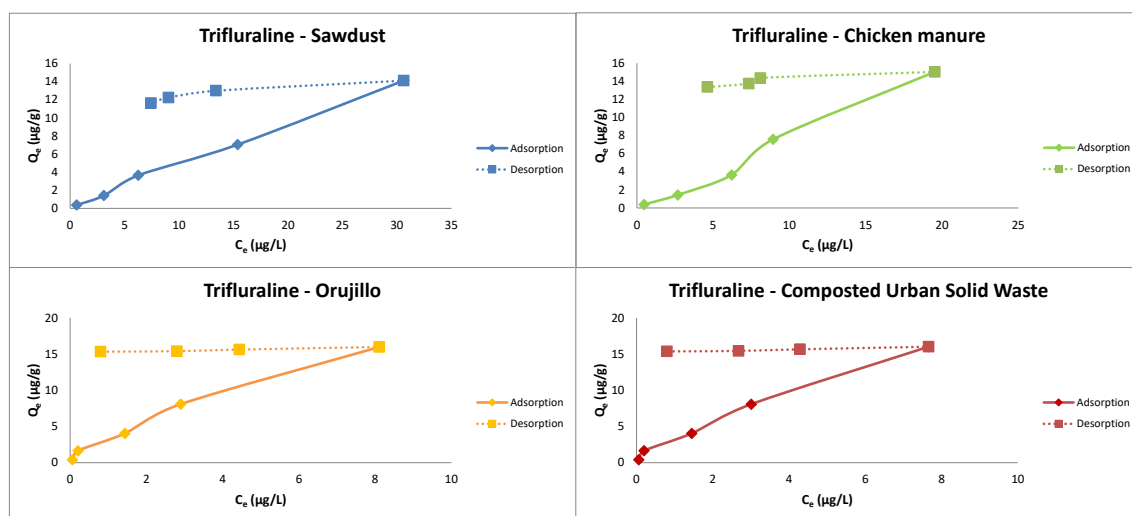

Figure S3. Sorption - desorption isotherms trifluralin on each organic residue.

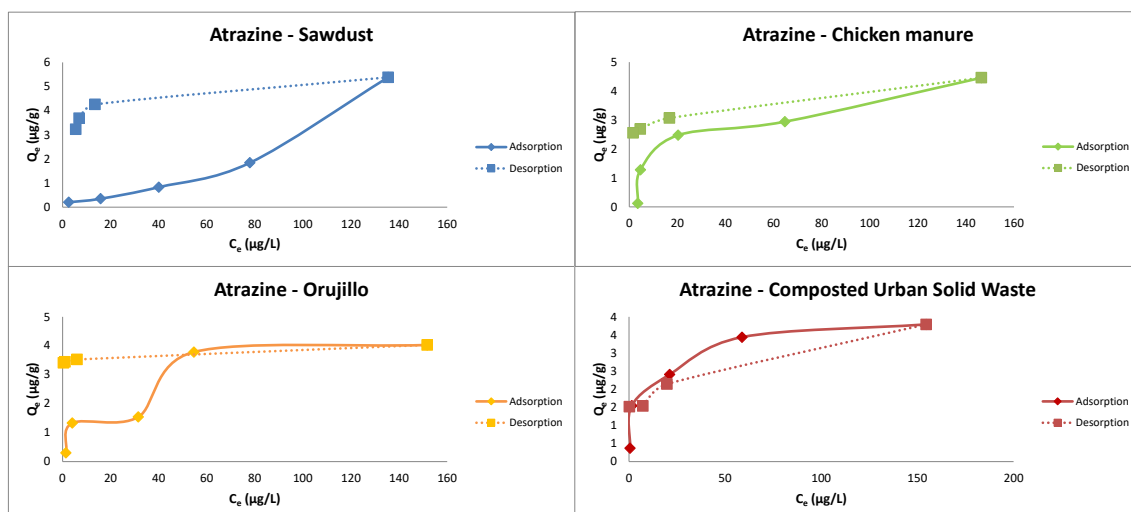

Figure S4. Sorption - desorption isotherms atrazine on each organic residue.

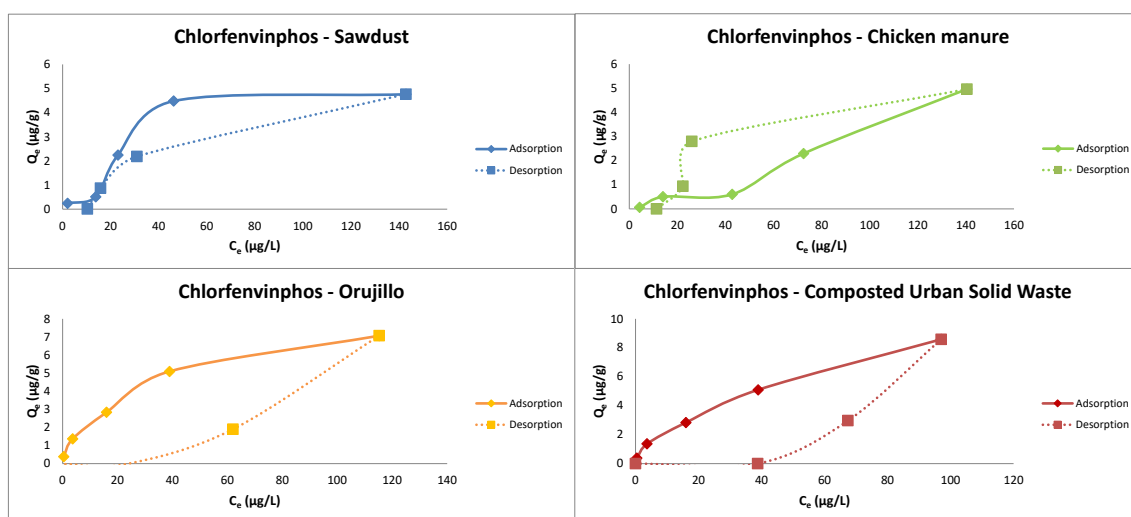

Figure S5. Sorption - desorption isotherms chlorfenvinphos on each organic residue.

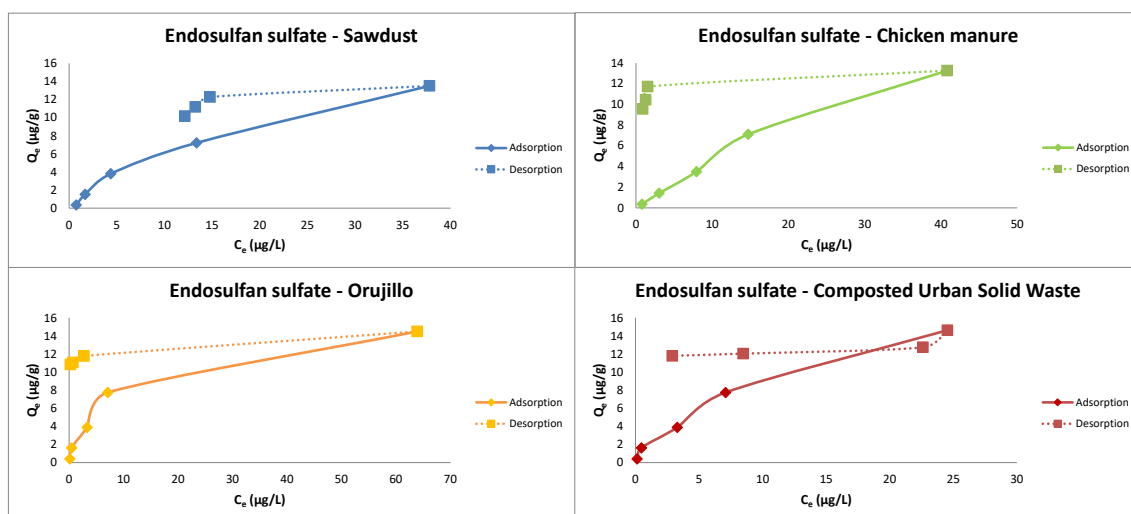

Figure S6. Sorption - desorption isotherms endosulfan sulfate on each organic residue.
